# Supplementary material
Source: PubMed Central journal article supplement (PMC3100166)

Fig-1

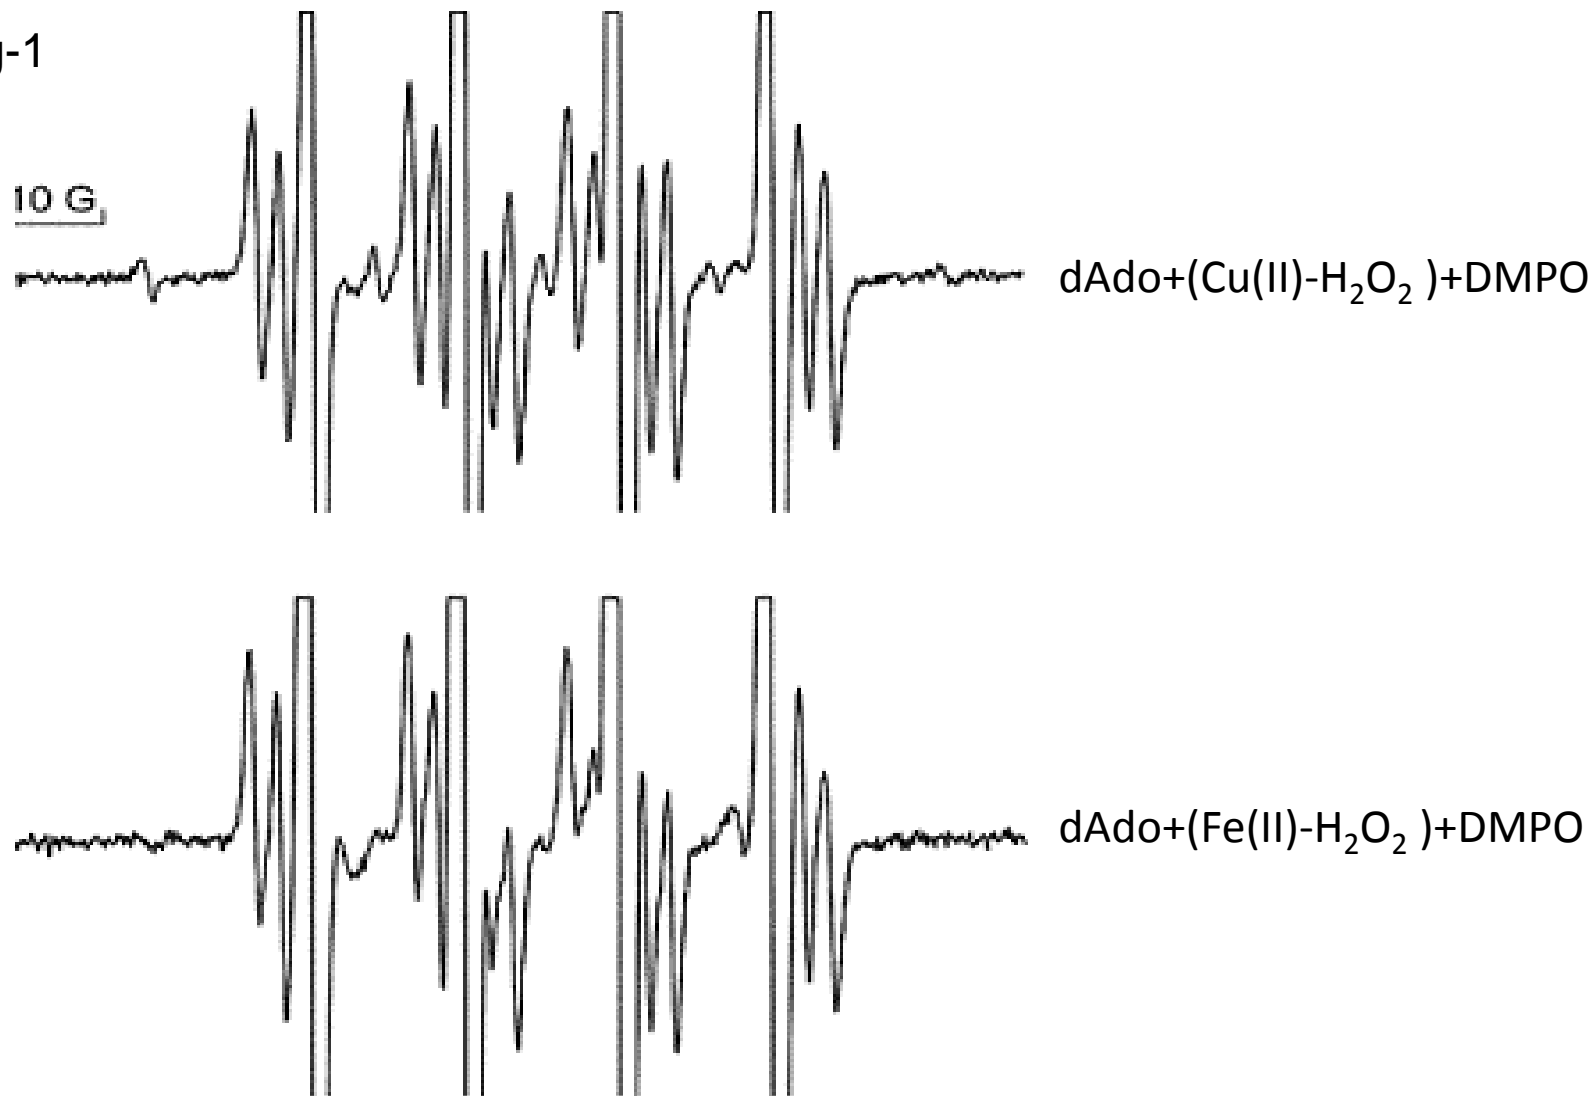

ESR spectra of equimolar concentration of all the reactants.

Fig -2

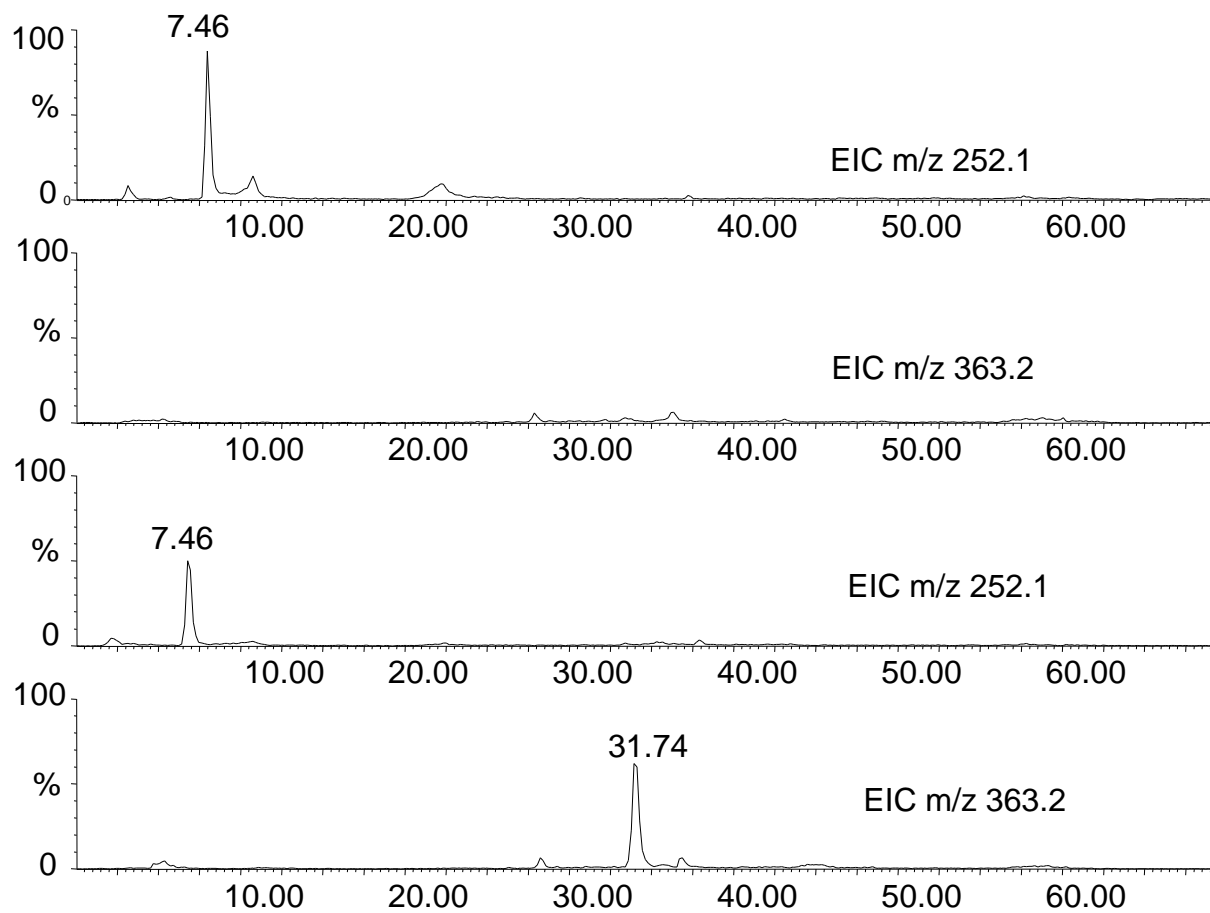

Fig-3

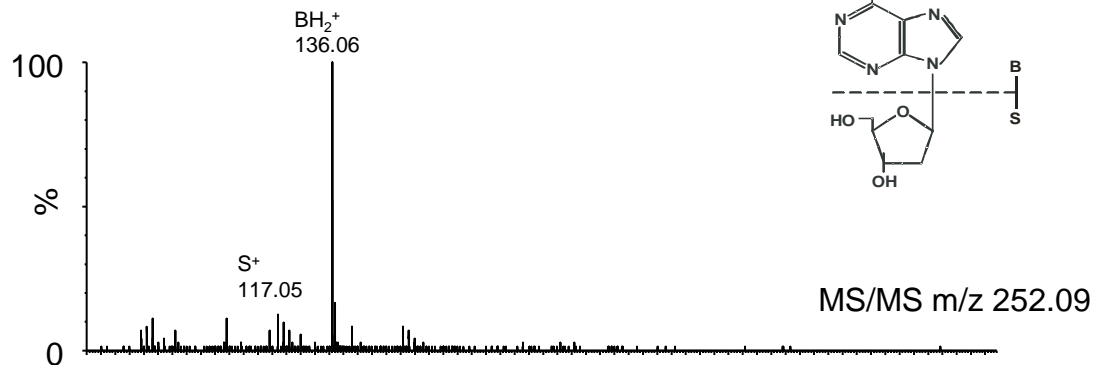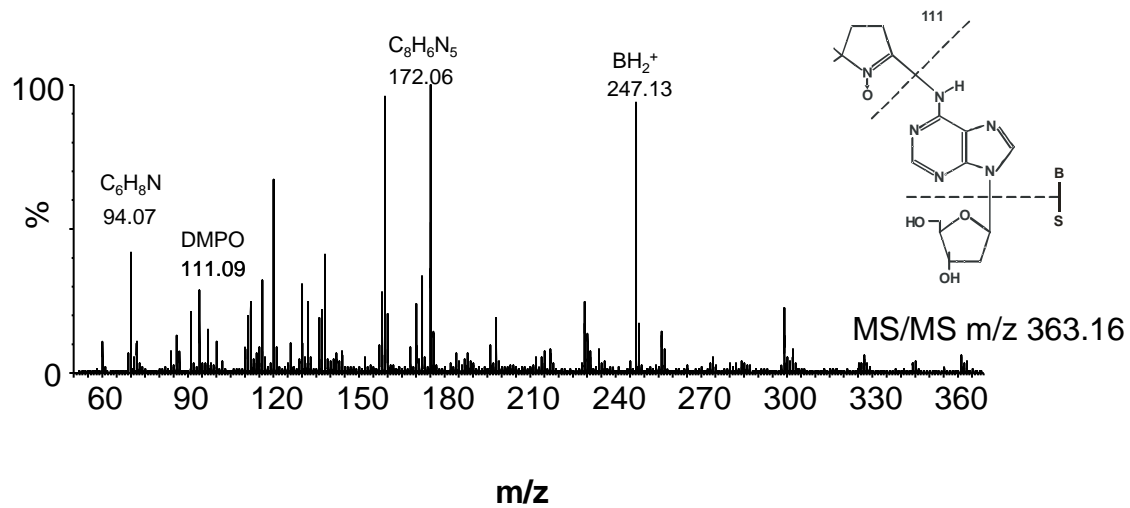

Supplement: NIHMS289655-supplement-01.pdf [file NIHMS289655-supplement-01.pdf]
